# Supplementary material for: Single-cell analysis of circadian dynamics in tissue explants
Source: PubMed Central journal article supplement — Mol Biol Cell. 2015 Nov 5;26(22):3940–5. doi: 10.1091/mbc.E15-06-0403 (PMC4710227; doi:10.1091/mbc.e15-06-0403), 2015-11-05
Supplement: supp_E15-06-0403v1_CombinedSupMats.pdf [file supp_E15-06-0403v1_CombinedSupMats.pdf]

# Supplemental Materials

*Molecular Biology of the Cell*

Lande-Diner et al.
